# Supplementary material for: Photocatalytic Degradation of Tobacco Tar Using CsPbBr3 Quantum Dots Modified Bi2WO6 Composite Photocatalyst
Source: MDPI journal article supplement (doi:10.3390/nano11092422), 2021-09-17
Supplement: s1 [file s1]

# Photocatalytic degradation of tobacco tar using CsPbBr<sub>3</sub> Quantum Dots Modified Bi<sub>2</sub>WO<sub>6</sub> Composite Photocatalyst

Runda Huang<sup>1</sup>, Menglong Zhang<sup>2\*</sup>, Zhaoqiang Zheng<sup>1</sup>, Kunqiang Wang<sup>3</sup>, Xiao Liu<sup>3\*</sup>, Qizan Chen<sup>1</sup> and Dongxiang Luo<sup>13\*</sup>

<sup>1</sup>School of Materials and Energy, Guangdong University of Technology 510006, PR China;

<sup>2</sup>Institute of Semiconductors, South China Normal University, Guangzhou, Guangdong 510631, PR China;

<sup>3</sup>School of Chemistry and Chemical Engineering/Institute of Clean Energy and Materials/Guangzhou Key Laboratory for Clean Energy and Materials/Huangpu Hydrogen Innovation Center, Guangzhou University, Guangzhou 510006, PR China

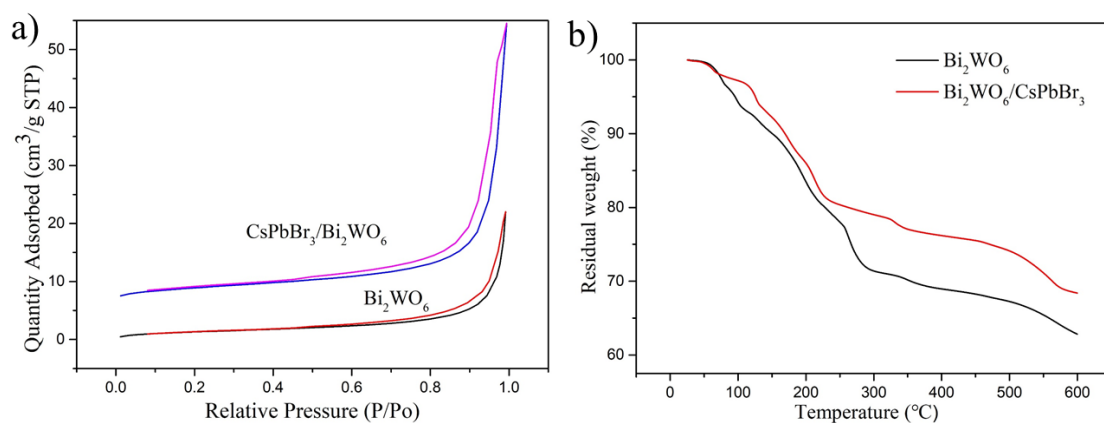

**Figure S1.** a) adsorption/desorption isotherms of pure  $\text{Bi}_2\text{WO}_6$  and  $\text{CsPbBr}_3/\text{Bi}_2\text{WO}_6$ ; b) the TGA curves of pure  $\text{Bi}_2\text{WO}_6$  and  $\text{CsPbBr}_3/\text{Bi}_2\text{WO}_6$ .

**Table S1.** The total organic carbon (TOC) content of PAHs with 15 wt%  $\text{CsPbBr}_3/\text{Bi}_2\text{WO}_6$  nanocomposite.

| Time            | TOC(mg/L) | TC (mg/L) | IC (mg/L) |
|-----------------|-----------|-----------|-----------|
| Before reaction | 5.6       | 6.0513    | 0.4513    |
| After reaction  | 2.3       | 2.433     | 0.133     |

**Table S2.** The main substrates from tobacco tar identified by GC-MS

| PAHs                    | Abbreviation | Concentration ( $\mu\text{g/mL}$ ) |
|-------------------------|--------------|------------------------------------|
| Acenaphthene            | ANP          | 1.28                               |
| Benzo(a)anthracene      | BaA          | 2.36                               |
| Benzo(b)fluoranthene    | BbF          | 1.47                               |
| Benzo(k)fluoranthene    | BkF          | 1.68                               |
| Benzo(a) perylene       | BaP          | 2.15                               |
| Benzo(g,h,i) perylene   | BgA          | 1.77                               |
| Fluorene                | FLU          | 1.45                               |
| Fluoranthene            | FLT          | 1.89                               |
| Indeno(1,2,3-cd) Pyrene | IDP          | 1.92                               |
| Phenanthrene            | PHT          | 1.12                               |

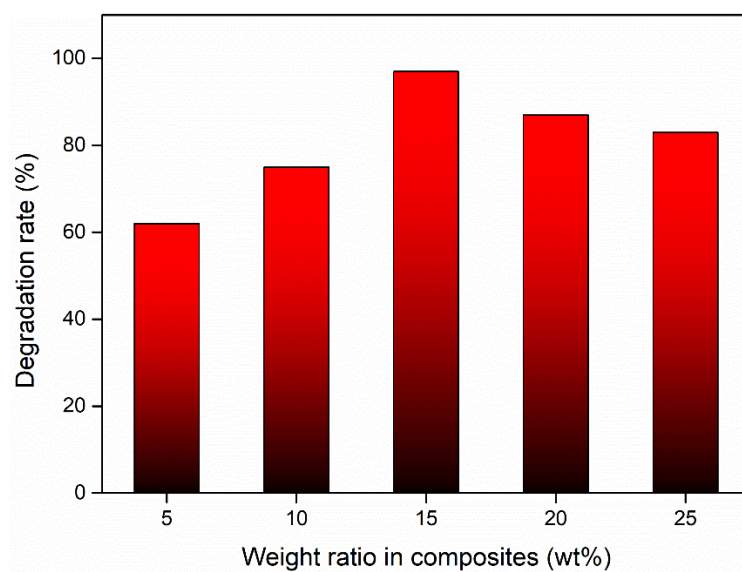

**Figure S2.** Degradation rate of PAHs using 15 wt% CsPbBr<sub>3</sub>/Bi<sub>2</sub>WO<sub>6</sub> composite photocatalyst with different CsPbBr<sub>3</sub> weight ratios.

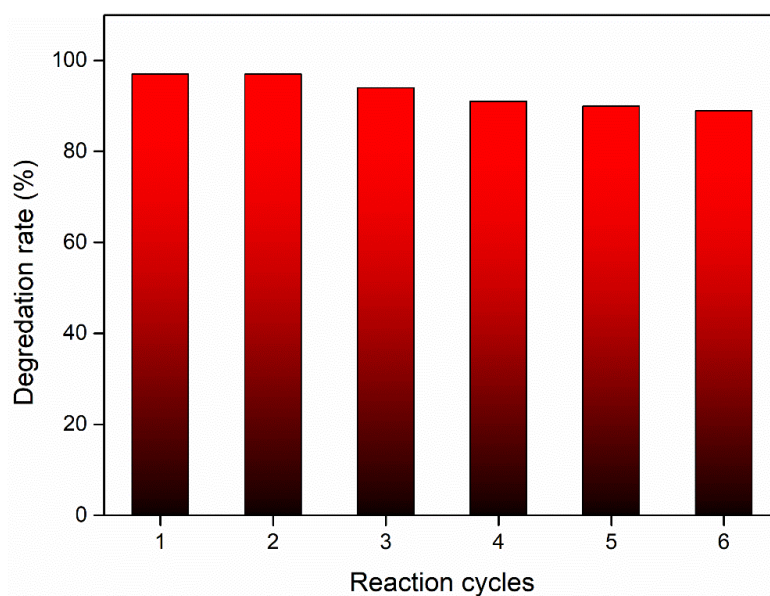

**Figure S3.** Degradation rate of PAHs using 15 wt% CsPbBr<sub>3</sub>/Bi<sub>2</sub>WO<sub>6</sub> composite photocatalyst with air in different reaction cycles.

**Table S3.** The main products from the photodegradation of tobacco tar. Noted that there are side-products with low concentration.

| Product names                     | Chemical Structure                                                                 | Molar percentage (%) |
|-----------------------------------|------------------------------------------------------------------------------------|----------------------|
| Benzoquinone,q                    |   | 12.6                 |
| Octopamine                        |   | 25.7                 |
| Benzoquinone 2,5 alkyl, 1,4 dione |   | 18.2                 |
| 2-amino toluene                   |  | 22.4                 |
| Carbon dioxide                    | O=C=O                                                                              | 21.1                 |

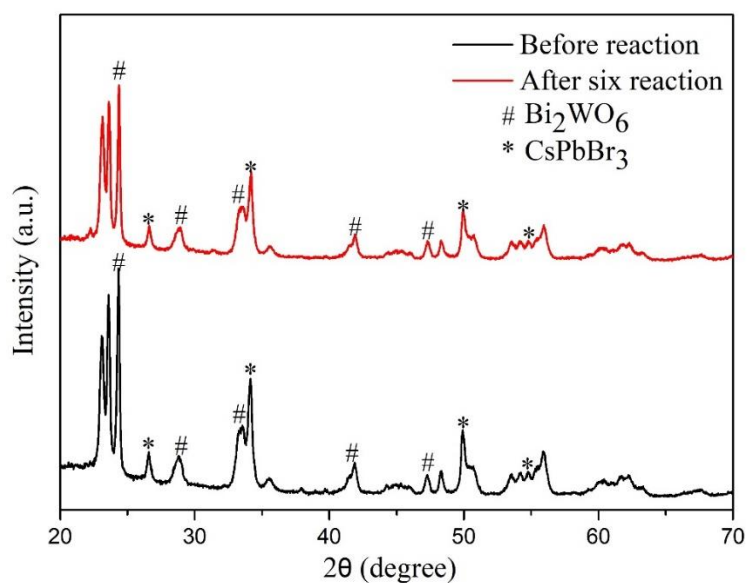

**Figure S4.** XRD patterns of 15 wt% CsPbBr<sub>3</sub>/Bi<sub>2</sub>WO<sub>6</sub> before reaction and after six reactions

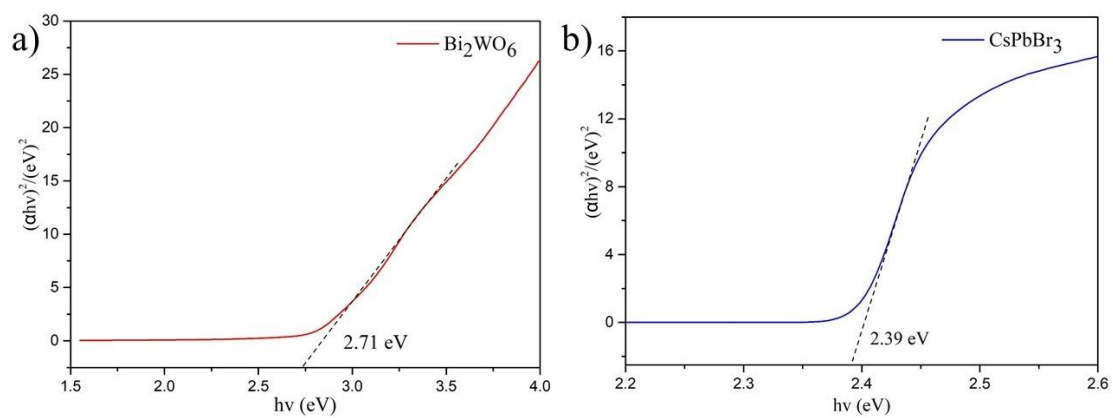

**Figure S5.** Tauc plots of the  $\text{Bi}_2\text{WO}_6$  (a) and  $\text{CsPbBr}_3$  (b).
